# Supplementary material for: Large scale, robust, and accurate whole transcriptome profiling from clinical formalin-fixed paraffin-embedded samples
Source: PubMed Central journal article supplement (PMC7572424; doi:10.1038/s41598-020-74483-1), 2020-10-19
Supplement: 41598_2020_74483_MOESM7_ESM.pdf [file 41598_2020_74483_MOESM7_ESM.pdf]

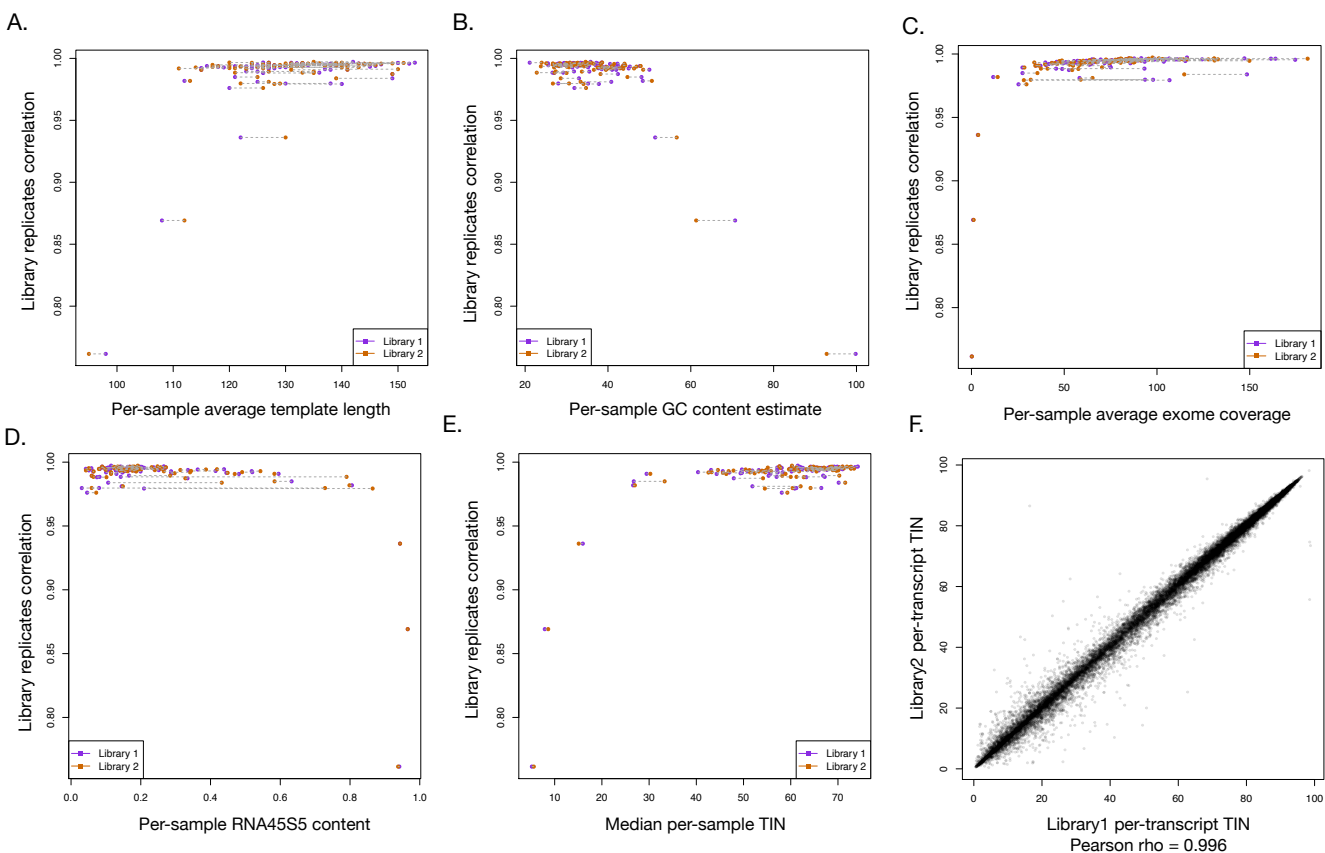

Supplementary Figure 11: Comparison of replicate correlations and various sample quality metrics in direct library replicates. In A - E, for each replicate pair we show a given quality metric for both replicates, on the y-axis we show correlation between these pairs; each replicate pair is connected by a dashed line. A) Average template length. B) GC contents. C) Average exome coverage. D) rRNA depletion quality. E) Median per-sample TIN. F) Comparison of per-transcript median TIN between library replicate pairs, showing high consistency in transcript quality.
