# Supplementary material for: Large scale, robust, and accurate whole transcriptome profiling from clinical formalin-fixed paraffin-embedded samples
Source: PubMed Central journal article supplement (PMC7572424; doi:10.1038/s41598-020-74483-1), 2020-10-19
Supplement: 41598_2020_74483_MOESM8_ESM.pdf [file 41598_2020_74483_MOESM8_ESM.pdf]

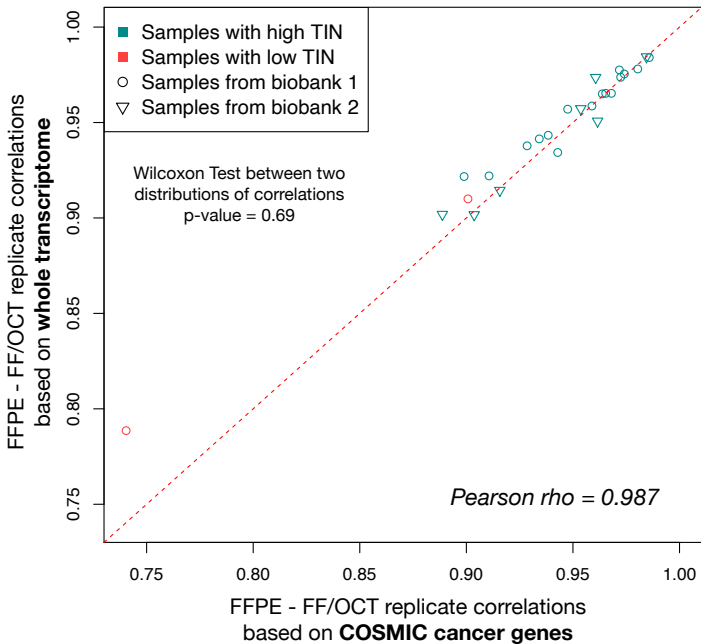

Supplementary Figure 12: Correlations of transcriptional profiles of FFPE - FF/OCT replicates with different gene sets (whole transcriptome on the y-axis vs. COSMIC cancer genes on the x-axis). Correlations in pairs where at least one sample has low TIN are indicated in red. Wilcoxon Test statistical test that examines if these correlations form a different distribution results in p-value = 0.69, indicating that these distributions are likely the same.
