# Supplementary material for: Large scale, robust, and accurate whole transcriptome profiling from clinical formalin-fixed paraffin-embedded samples
Source: PubMed Central journal article supplement (PMC7572424; doi:10.1038/s41598-020-74483-1), 2020-10-19
Supplement: 41598_2020_74483_MOESM11_ESM.pdf [file 41598_2020_74483_MOESM11_ESM.pdf]

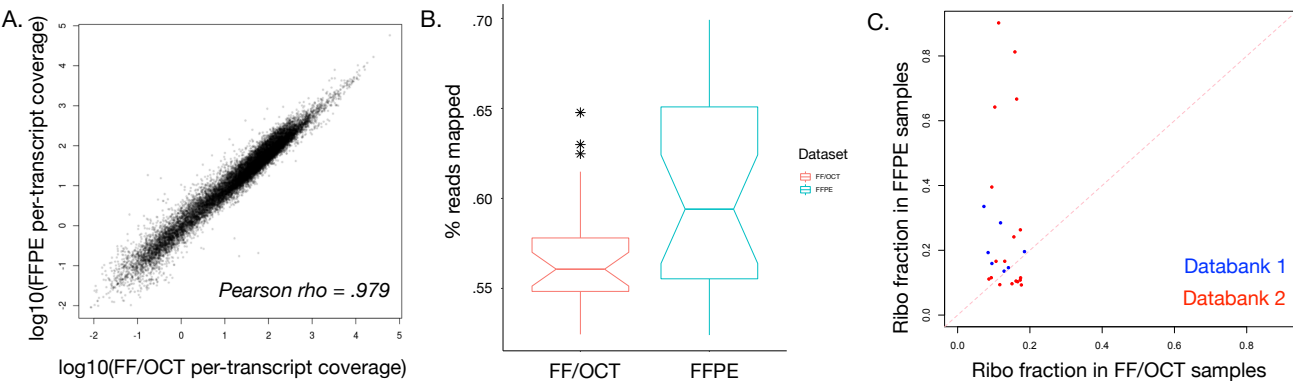

Supplementary Figure 15: Comparison of coverage and read mapping in FFPE vs. FF/OCT replicates. A) Average transcript coverage is highly consistent between replicates. B) Percent reads mapped (mapped reads / total reads) in FFPE vs. FF/OCT replicates. The box plot shows higher mapping rate in FFPE samples. C) Comparison of ribosomal RNA fraction in FFPE and FF/OCT replicate samples. FFPE samples tend to have higher ribosomal RNA content than corresponding FF/OCT samples.
