# Supplementary material for: Large scale, robust, and accurate whole transcriptome profiling from clinical formalin-fixed paraffin-embedded samples
Source: PubMed Central journal article supplement (PMC7572424; doi:10.1038/s41598-020-74483-1), 2020-10-19
Supplement: 41598_2020_74483_MOESM15_ESM.pdf [file 41598_2020_74483_MOESM15_ESM.pdf]

### Comparison of per-sample quality metrics in FFPE - FF/OCT replicates

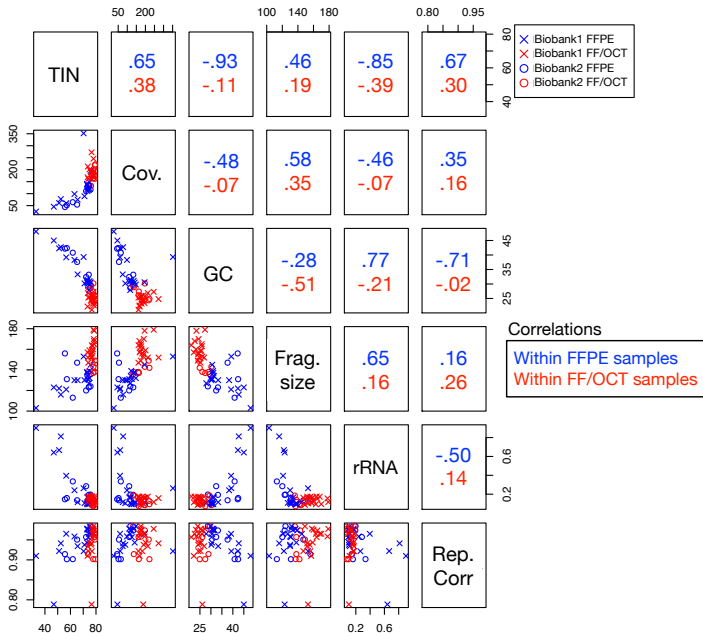

Supplementary Figure 19: Relationships between different quality metrics in FFPE vs. FF/OCT replicates. Data repositories are indicated by the point shape and tissue/storage type is indicated by the point color.
