# Supplementary material for: Large scale, robust, and accurate whole transcriptome profiling from clinical formalin-fixed paraffin-embedded samples
Source: PubMed Central journal article supplement (PMC7572424; doi:10.1038/s41598-020-74483-1), 2020-10-19
Supplement: 41598_2020_74483_MOESM16_ESM.pdf [file 41598_2020_74483_MOESM16_ESM.pdf]

A. Exon bias vs. TIN

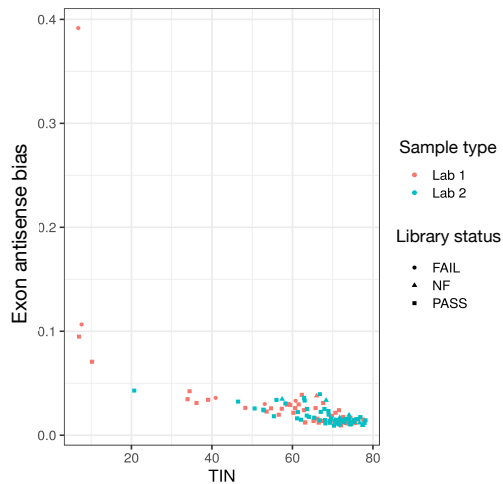

B. Exon bias vs. GC

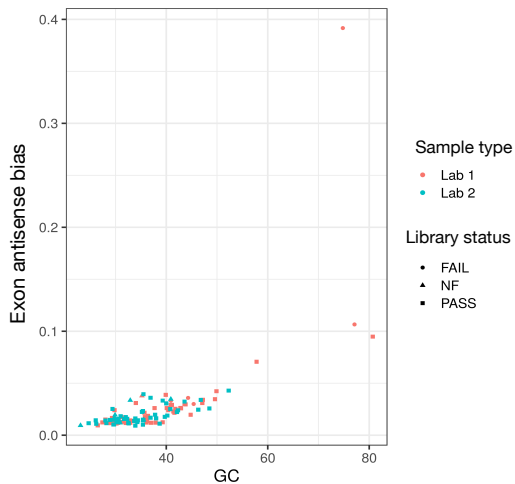

Supplementary Figure 2: Exon bias vs. TIN (A) and GC contents (B). Exon bias correlates negatively with TIN and positively with GC contents.
