# Supplementary material for: Large scale, robust, and accurate whole transcriptome profiling from clinical formalin-fixed paraffin-embedded samples
Source: PubMed Central journal article supplement (PMC7572424; doi:10.1038/s41598-020-74483-1), 2020-10-19

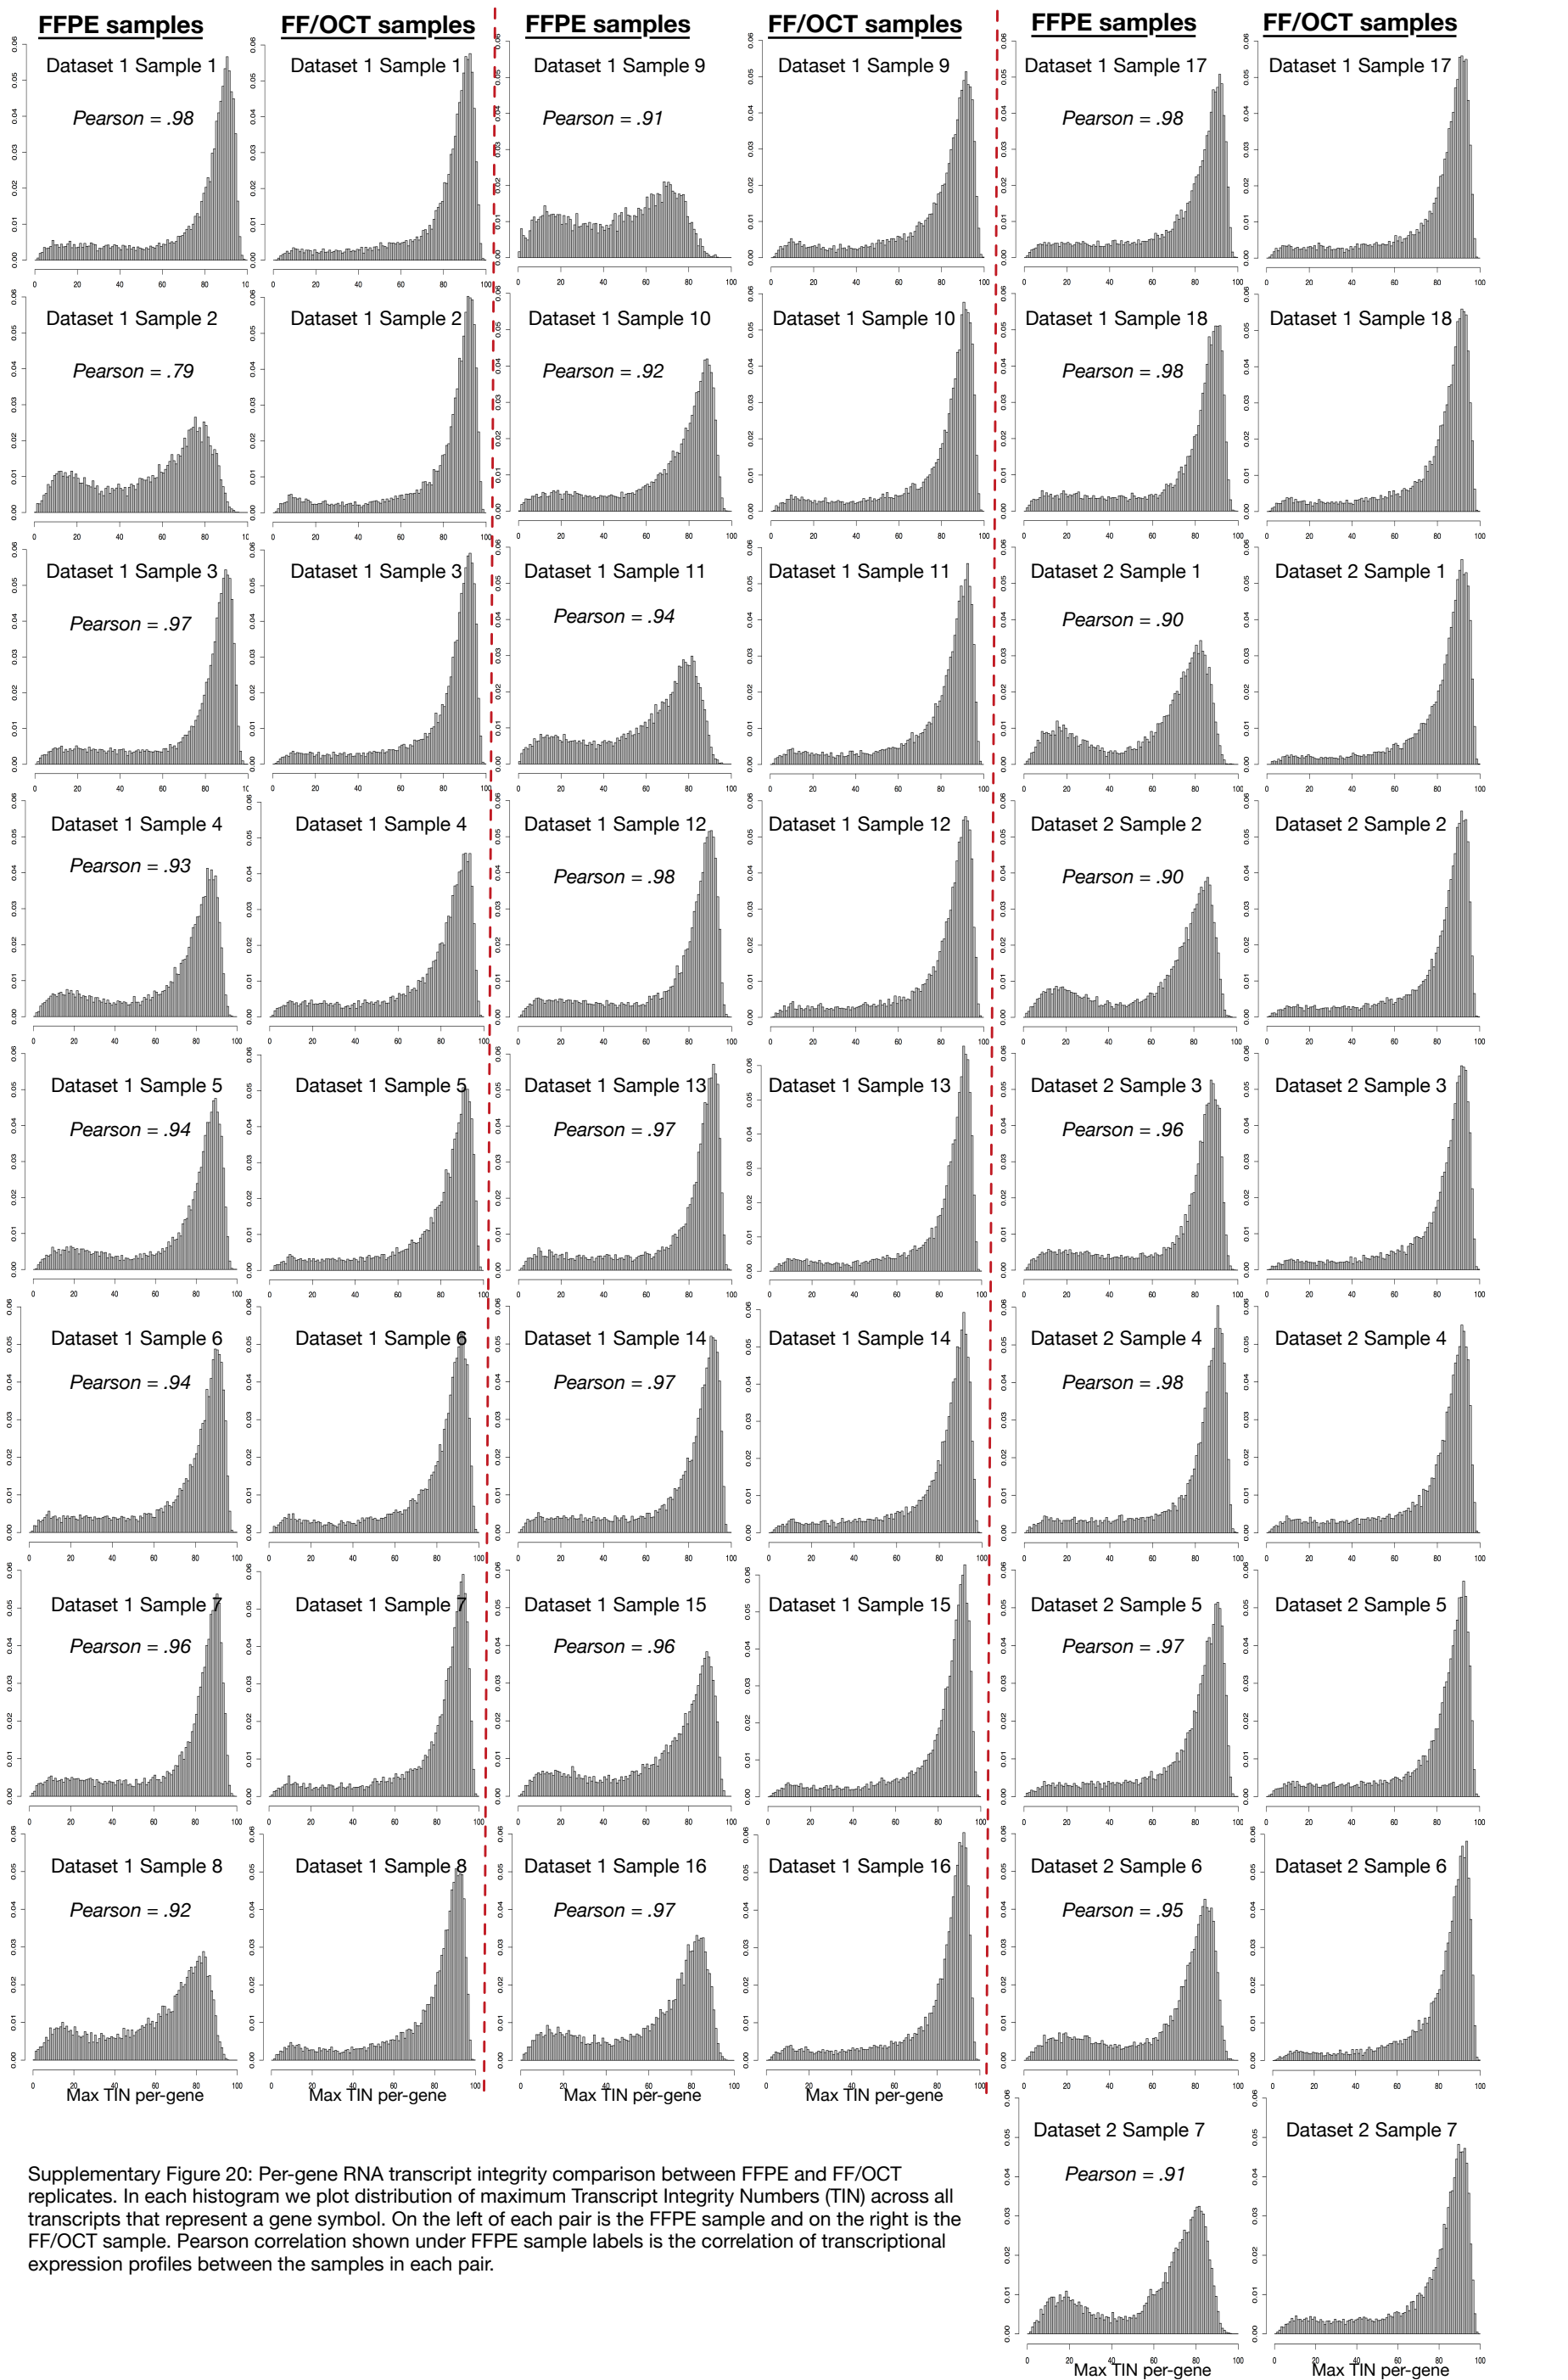

Supplement: 41598_2020_74483_MOESM17_ESM.pdf [file 41598_2020_74483_MOESM17_ESM.pdf]
