# Supplementary material for: Large scale, robust, and accurate whole transcriptome profiling from clinical formalin-fixed paraffin-embedded samples
Source: PubMed Central journal article supplement (PMC7572424; doi:10.1038/s41598-020-74483-1), 2020-10-19
Supplement: 41598_2020_74483_MOESM23_ESM.pdf [file 41598_2020_74483_MOESM23_ESM.pdf]

## Differential expression contrasts

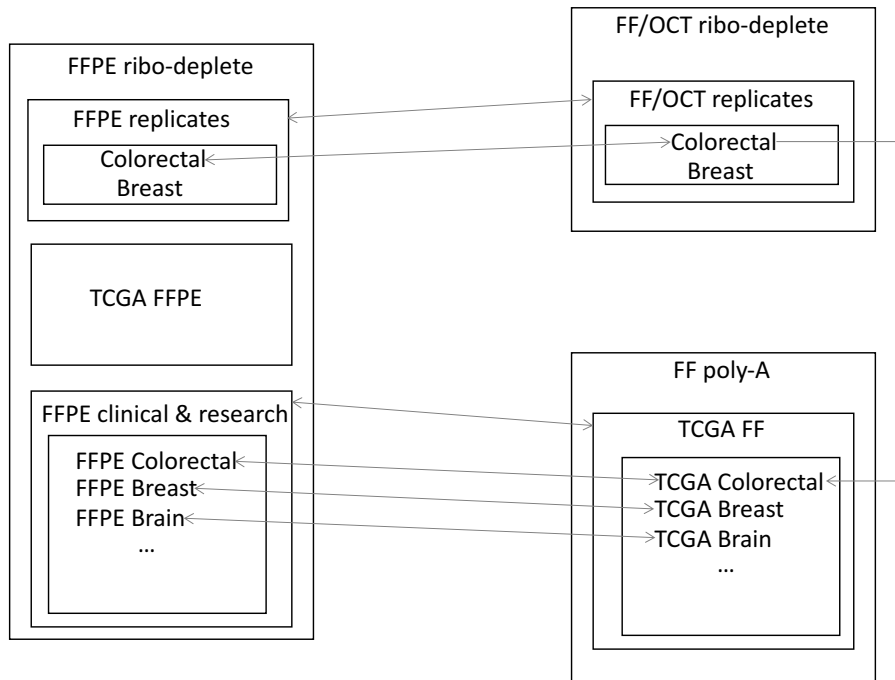

Supplementary Figure 26: Overview of differential expression contrasts performed in this study for Figure 6C.
