# Supplementary material for: Large scale, robust, and accurate whole transcriptome profiling from clinical formalin-fixed paraffin-embedded samples
Source: PubMed Central journal article supplement (PMC7572424; doi:10.1038/s41598-020-74483-1), 2020-10-19
Supplement: 41598_2020_74483_MOESM29_ESM.pdf [file 41598_2020_74483_MOESM29_ESM.pdf]

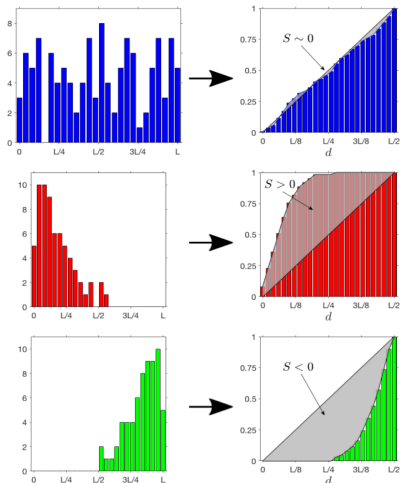

Supplementary Figure 31: Graphical explanation cumulative sums used for the TB score. In the top panel a uniform coverage produces a linear cumulative distribution  $s_i$  and thus the integral  $S$  is close to zero. In the case of a read coverage biased to the left end of the transcript (middle panel) the cumulative function  $s_i$  grows faster than linearly producing a positive value of  $S$  and if the coverage is biased to the right end of the transcript (lower panel) then  $s_i$  would grow slower than linearly and  $S$  have a negative value.
