# Supplementary material for: Large scale, robust, and accurate whole transcriptome profiling from clinical formalin-fixed paraffin-embedded samples
Source: PubMed Central journal article supplement (PMC7572424; doi:10.1038/s41598-020-74483-1), 2020-10-19
Supplement: 41598_2020_74483_MOESM34_ESM.pdf [file 41598_2020_74483_MOESM34_ESM.pdf]

A.

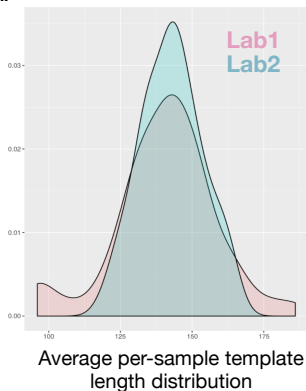

B.

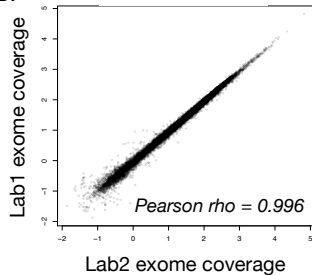

C.

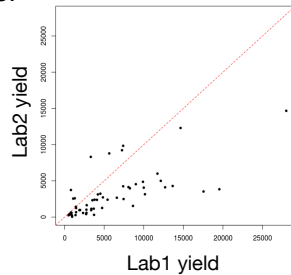

D.

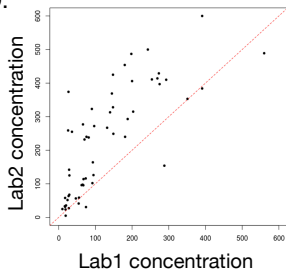

E.

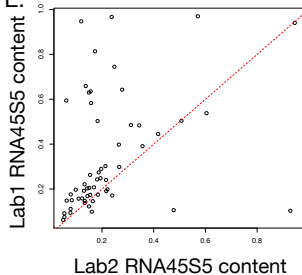

Supplementary Figure 6: Comparison of sample quality metrics in extraction replicates. A) Average template length comparison shows similar results for both labs. B) Average exome coverage is highly correlated between two labs. C-D) Lab2 had higher concentration but lower yield. E) rRNA depletion was better at Lab2.
