# Supplementary material for: Large scale, robust, and accurate whole transcriptome profiling from clinical formalin-fixed paraffin-embedded samples
Source: PubMed Central journal article supplement (PMC7572424; doi:10.1038/s41598-020-74483-1), 2020-10-19
Supplement: 41598_2020_74483_MOESM35_ESM.pdf [file 41598_2020_74483_MOESM35_ESM.pdf]

A.

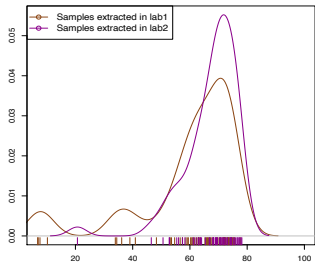

Median per-sample TIN distribution

B.

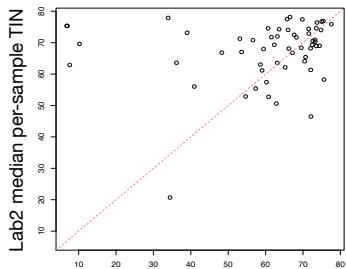

Lab1 median per-sample TIN

C.

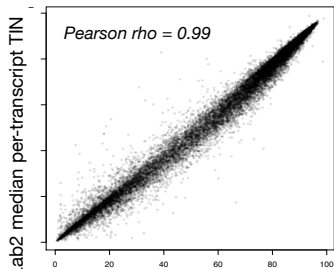

Lab1 median per-transcript TIN

Supplementary Figure 7: Comparison of TIN in extraction replicates. A) Median per-sample TIN is slightly higher in Lab2. B) Median per-sample TIN tends to be higher in Lab2 samples. C) Median per-transcript TIN is highly correlated between two labs.
