# Supplementary material for: Large scale, robust, and accurate whole transcriptome profiling from clinical formalin-fixed paraffin-embedded samples
Source: PubMed Central journal article supplement (PMC7572424; doi:10.1038/s41598-020-74483-1), 2020-10-19
Supplement: 41598_2020_74483_MOESM36_ESM.pdf [file 41598_2020_74483_MOESM36_ESM.pdf]

## Sample median TIN in library replicates

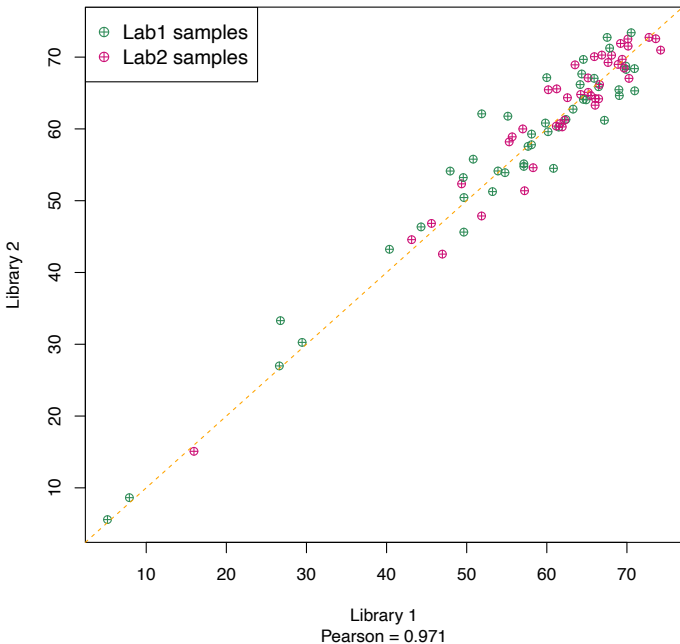

Supplementary Figure 8: Comparison of per-sample median TIN in direct library replicates, showing high reproducibility in sample quality of the same material.
